# Supplementary material for: A Continental-Scale Connectivity Analysis to Predict Current and Future Colonization Trends of Biofuel Plant’s Pests for Sub-Saharan African Countries
Source: MDPI journal article supplement (doi:10.3390/land10111276), 2021-11-20
Supplement: s1 [file s1]

p-values ( $\alpha = 0.05$ ) obtained for Kolmogorov-Smirnov test performed over connectivity values (or future changes of it) of each sub-Saharan African country

| <b>Country</b>           | <b>Current</b> | <b>2050 RCP4.5</b> | <b>2050 RCP6.0</b> |
|--------------------------|----------------|--------------------|--------------------|
| Angola                   | 1.8E-13        | 1.5E-03            | 1.2E-02            |
| Benin                    | 6.5E-36        | 3.8E-57            | 1.3E-14            |
| Botswana                 | 1.2E-04        | 1.4E-02            | 1.5E-02            |
| Burkina Faso             | 9.9E-03        | 4.5E-04            | 4.5E-04            |
| Burundi                  | 6.4E-11        | 1.1E-04            | 2.3E-04            |
| Cameroon                 | 1.1E-04        | 3.9E-04            | 9.1E-09            |
| Central African Republic | 6.5E-05        | 5.3E-06            | 1.4E-04            |
| Chad                     | 1.6E-03        | 1.2E-06            | 3.8E-57            |
| Congo (D. R.)            | 1.2E-15        | 3.8E-57            | 5.8E-05            |
| Djibouti                 | 5.6E-04        | 1.3E-02            | 1.3E-02            |
| Equatorial Guinea        | 1.1E-09        | 3.7E-02            | 5.7E-03            |
| Eritrea                  | 7.2E-04        | 8.3E-03            | 2.4E-04            |
| Ethiopia                 | 2.4E-22        | 5.8E-04            | 3.0E-05            |
| Gabon                    | 6.5E-03        | 4.8E-02            | 2.0E-03            |
| Ghana                    | 2.9E-13        | 3.3E-02            | 3.8E-57            |
| Guinea                   | 7.4E-04        | 4.2E-02            | 1.6E-03            |
| Guinea-Bissau            | 5.8E-03        | 4.3E-02            | 3.5E-03            |
| Ivory Coast              | 1.2E-02        | 2.4E-03            | 3.8E-57            |
| Kenya                    | 4.6E-07        | 7.9E-02            | 1.1E-07            |
| Lesotho                  | 1.6E-06        | 8.7E-03            | 7.3E-03            |
| Liberia                  | 4.8E-08        | 7.2E-53            | 5.3E-03            |
| Malawi                   | 1.1E-07        | 2.3E-02            | 7.5E-03            |
| Mali                     | 1.1E-02        | 5.1E-03            | 9.9E-03            |
| Mauritania               | 3.2E-02        | 1.7E-03            | 2.1E-03            |
| Mozambique               | 6.9E-05        | 5.7E-02            | 6.8E-03            |
| Namibia                  | 1.8E-18        | 4.8E-10            | 1.8E-06            |
| Niger                    | 9.2E-03        | 2.1E-02            | 1.6E-03            |
| Nigeria                  | 1.0E-03        | 3.6E-06            | 3.8E-57            |
| Rep. of South Africa     | 1.3E-07        | 3.1E-05            | 3.8E-57            |
| Republic of Congo        | 2.0E-02        | 8.7E-05            | 5.0E-03            |
| Rwanda                   | 1.4E-07        | 4.1E-04            | 1.2E-04            |
| Senegal                  | 6.4E-04        | 1.2E-03            | 1.7E-58            |
| Sierra Leone             | 1.6E-01        | 2.3E-02            | 5.5E-03            |
| Somalia                  | 9.0E-57        | 2.6E-02            | 2.8E-03            |
| Sudan                    | 1.2E-03        | 3.4E-03            | 6.0E-03            |
| Swaziland                | 1.3E-30        | 3.8E-57            | 4.7E-02            |
| Tanzania                 | 2.3E-23        | 4.7E-05            | 9.4E-03            |
| The Gambia               | 3.5E-06        | 1.1E-02            | 8.0E-03            |
| Togo                     | 1.3E-05        | 5.4E-09            | 3.8E-57            |
| Uganda                   | 3.3E-12        | 2.2E-02            | 1.3E-02            |
| Zambia                   | 9.6E-26        | 3.3E-03            | 2.2E-03            |
| Zimbabwe                 | 1.7E-02        | 9.1E-04            | 3.8E-57            |
